# Supplementary material for: Genetic Identification and Technological Potential of Indigenous Lactic Acid Bacteria Isolated from Alheira, a Traditional Portuguese Sausage
Source: MDPI journal article supplement (doi:10.3390/foods13040598), 2024-02-16
Supplement: s1 [file s1]

Supplementary Table S1. Summary statistics (minimum [Min], first quantile [1<sup>st</sup> Qu], median, mean, third quantile [3<sup>rd</sup> Qu], and maximum [Max] values) of phenotypic data from lactic acid bacteria isolated from *alheira*, a Portuguese fermented meat sausage. Legend:  $\Delta$ pH03,  $\Delta$ pH06,  $\Delta$ pH36: pH drop between t=0 h and t=3 h, t=0 h and t=6 h, and t=3 h and t=6 h at 30 °C, respectively; pH6: pH value after 6 h at 30 °C; ProteolyticAct: diameter of proteolytic activity (mm) measure in vitro; LAC: L-lactic acid (g/L). For each pathogen: ID\_10C and ID\_37C: diameter of inhibition (mm) tested at 10 °C and 37 °C, respectively.

| Species                                 | Min.   | 1 <sup>st</sup> Qu. | Median | Mean   | 3rdQu. | Max.   |
|-----------------------------------------|--------|---------------------|--------|--------|--------|--------|
| <i>Enterococcus faecium</i> (n=20)      |        |                     |        |        |        |        |
| Proteolytic Activity (mm)               | 0.000  | 0.000               | 0.000  | 0.055  | 0.000  | 1.110  |
| pH6                                     | 5.711  | 5.756               | 5.786  | 5.786  | 5.812  | 5.895  |
| $\Delta$ pH03                           | 0.244  | 0.306               | 0.332  | 0.331  | 0.355  | 0.380  |
| $\Delta$ pH06                           | 0.741  | 0.817               | 0.856  | 0.848  | 0.875  | 0.916  |
| $\Delta$ pH36                           | 0.488  | 0.501               | 0.516  | 0.516  | 0.529  | 0.539  |
| LAC (g/L)                               | 0.162  | 0.237               | 0.273  | 0.3253 | 0.4155 | 0.5911 |
| ID_10C <i>L. monocytogenes</i> (mm)     | 7.553  | 11.249              | 11.486 | 11.291 | 11.685 | 11.940 |
| ID_37C <i>L. monocytogenes</i> (mm)     | 5.995  | 8.021               | 8.320  | 8.196  | 8.421  | 9.235  |
| ID_10C <i>S. aureus</i> (mm)            | 3.490  | 4.638               | 4.954  | 4.876  | 5.215  | 5.628  |
| ID_37C <i>S. aureus</i> (mm)            | 0.000  | 0.000               | 0.000  | 0.181  | 0.404  | 0.765  |
| ID_10C <i>S. Typhimurium</i> (mm)       | 2.808  | 3.723               | 4.335  | 4.266  | 4.711  | 6.130  |
| ID_37C <i>S. Typhimurium</i> (mm)       | 0.000  | 0.000               | 0.000  | 0.000  | 0.000  | 0.000  |
| <i>Lactiseibacillus paracasei</i> (n=6) |        |                     |        |        |        |        |
| Proteolytic Activity (mm)               | 0.000  | 2.300               | 4.256  | 3.462  | 4.968  | 4.995  |
| pH6                                     | 5.793  | 5.824               | 5.889  | 6.038  | 6.398  | 6.438  |
| $\Delta$ pH03                           | 0.057  | 0.082               | 0.238  | 0.197  | 0.271  | 0.297  |
| $\Delta$ pH06                           | 0.111  | 0.156               | 0.738  | 0.556  | 0.792  | 0.799  |
| $\Delta$ pH36                           | 0.029  | 0.099               | 0.497  | 0.358  | 0.499  | 0.527  |
| LAC (g/L)                               | 0.047  | 0.055               | 0.062  | 0.252  | 0.644  | 0.645  |
| ID_10C <i>L. monocytogenes</i> (mm)     | 16.730 | 17.200              | 17.440 | 17.670 | 18.280 | 18.710 |
| ID_37C <i>L. monocytogenes</i> (mm)     | 9.182  | 9.954               | 10.414 | 10.447 | 10.854 | 11.873 |
| ID_10C <i>S. aureus</i> (mm)            | 7.100  | 8.109               | 9.236  | 9.334  | 10.405 | 11.902 |
| ID_37C <i>S. aureus</i> (mm)            | 8.410  | 8.675               | 8.869  | 9.065  | 9.445  | 9.992  |
| ID_10C <i>S. Typhimurium</i> (mm)       | 8.648  | 8.805               | 9.744  | 9.750  | 10.606 | 10.977 |

|                                            |        |        |        |        |        |        |
|--------------------------------------------|--------|--------|--------|--------|--------|--------|
| ID_37C <i>S. Typhimurium</i> (mm)          | 9.967  | 10.949 | 11.611 | 11.520 | 11.922 | 13.175 |
| <i>Lactiplantibacillus herbarum</i> (n=2)  |        |        |        |        |        |        |
| Proteolytic Activity (mm)                  | 0.000  | 0.000  | 0.410  | 0.410  | 0.820  | 0.820  |
| pH6                                        | 6.477  | 6.477  | 6.478  | 6.478  | 6.478  | 6.478  |
| $\Delta$ pH03                              | 0.106  | 0.106  | 0.131  | 0.131  | 0.155  | 0.155  |
| $\Delta$ pH06                              | 0.162  | 0.162  | 0.188  | 0.188  | 0.213  | 0.213  |
| $\Delta$ pH36                              | 0.056  | 0.056  | 0.056  | 0.056  | 0.057  | 0.057  |
| LAC (g/L)                                  | 0.529  | 0.529  | 0.557  | 0.557  | 0.585  | 0.585  |
| ID_10C <i>L. monocytogenes</i> (mm)        | 17.410 | 18.280 | 19.140 | 19.140 | 20.000 | 20.860 |
| ID_37C <i>L. monocytogenes</i> (mm)        | 11.400 | 11.600 | 11.790 | 11.790 | 11.980 | 12.170 |
| ID_10C <i>S. aureus</i> (mm)               | 10.720 | 11.010 | 11.290 | 11.290 | 11.580 | 11.870 |
| ID_37C <i>S. aureus</i> (mm)               | 7.662  | 7.669  | 7.675  | 7.675  | 7.681  | 7.688  |
| ID_10C <i>S. Typhimurium</i> (mm)          | 10.940 | 11.070 | 11.210 | 11.210 | 11.340 | 11.480 |
| ID_37C <i>S. Typhimurium</i> (mm)          | 9.262  | 9.779  | 10.295 | 10.295 | 10.811 | 11.328 |
| <i>Lactiplantibacillus plajomi</i> (n=3)   |        |        |        |        |        |        |
| Proteolytic Activity (mm)                  | 2.053  | 2.053  | 3.335  | 3.068  | 3.817  | 3.817  |
| pH6                                        | 5.804  | 5.804  | 6.471  | 6.249  | 6.471  | 6.471  |
| $\Delta$ pH03                              | 0.155  | 0.155  | 0.189  | 0.224  | 0.329  | 0.329  |
| $\Delta$ pH06                              | 0.230  | 0.230  | 0.239  | 0.430  | 0.820  | 0.820  |
| $\Delta$ pH36                              | 0.049  | 0.049  | 0.075  | 0.205  | 0.490  | 0.490  |
| LAC (g/L)                                  | 0.092  | 0.092  | 0.514  | 0.427  | 0.676  | 0.676  |
| ID_10C <i>L. monocytogenes</i> (mm)        | 19.180 | 19.490 | 19.800 | 21.620 | 22.830 | 25.860 |
| ID_37C <i>L. monocytogenes</i> (mm)        | 9.375  | 9.920  | 10.465 | 10.282 | 10.735 | 11.005 |
| ID_10C <i>S. aureus</i> (mm)               | 8.332  | 10.932 | 13.533 | 11.915 | 13.706 | 13.880 |
| ID_37C <i>S. aureus</i> (mm)               | 7.478  | 7.834  | 8.190  | 8.233  | 8.611  | 9.033  |
| ID_10C <i>S. Typhimurium</i> (mm)          | 9.375  | 9.887  | 10.400 | 10.809 | 11.526 | 12.652 |
| ID_37C <i>S. Typhimurium</i> (mm)          | 9.842  | 9.893  | 9.943  | 10.967 | 11.529 | 13.115 |
| <i>Lactiplantibacillus plantarum</i> (n=4) |        |        |        |        |        |        |
| Proteolytic Activity (mm)                  | 1.780  | 2.095  | 3.315  | 3.219  | 4.439  | 4.468  |
| pH6                                        | 5.834  | 5.856  | 6.069  | 6.101  | 6.314  | 6.433  |
| $\Delta$ pH03                              | 0.117  | 0.155  | 0.211  | 0.200  | 0.256  | 0.258  |

|                                         |        |        |        |        |        |        |
|-----------------------------------------|--------|--------|--------|--------|--------|--------|
| $\Delta$ pH06                           | 0.277  | 0.368  | 0.574  | 0.546  | 0.752  | 0.758  |
| $\Delta$ pH36                           | 0.109  | 0.238  | 0.386  | 0.346  | 0.494  | 0.503  |
| LAC (g/L)                               | 0.248  | 0.332  | 0.423  | 0.396  | 0.487  | 0.462  |
| ID_10C <i>L. monocytogenes</i> (mm)     | 17.120 | 18.380 | 20.170 | 19.770 | 21.560 | 21.640 |
| ID_37C <i>L. monocytogenes</i> (mm)     | 9.127  | 9.182  | 9.774  | 9.778  | 10.370 | 10.438 |
| ID_10C <i>S. aureus</i> (mm)            | 9.102  | 9.770  | 10.611 | 10.828 | 11.669 | 12.988 |
| ID_37C <i>S. aureus</i> (mm)            | 7.475  | 7.544  | 7.798  | 8.299  | 8.552  | 10.125 |
| ID_10C <i>S. Typhimurium</i> (mm)       | 9.310  | 9.842  | 10.158 | 10.085 | 10.400 | 10.715 |
| ID_37C <i>S. Typhimurium</i> (mm)       | 10.610 | 10.930 | 11.560 | 11.560 | 12.190 | 12.500 |
| <i>Latilactobacillus sakei</i> (n=11)   |        |        |        |        |        |        |
| Proteolytic Activity (mm)               | 0.000  | 0.000  | 0.000  | 0.759  | 0.852  | 4.287  |
| pH6                                     | 6.367  | 6.387  | 6.434  | 6.446  | 6.511  | 6.519  |
| $\Delta$ pH03                           | 0.077  | 0.119  | 0.158  | 0.176  | 0.259  | 0.301  |
| $\Delta$ pH06                           | 0.148  | 0.171  | 0.231  | 0.239  | 0.302  | 0.339  |
| $\Delta$ pH36                           | 0.038  | 0.042  | 0.050  | 0.063  | 0.077  | 0.146  |
| LAC (g/L)                               | 0.015  | 0.148  | 0.562  | 0.420  | 0.620  | 0.650  |
| ID_10C <i>L. monocytogenes</i> (mm)     | 10.790 | 12.850 | 14.100 | 14.620 | 16.160 | 19.660 |
| ID_37C <i>L. monocytogenes</i> (mm)     | 10.070 | 10.520 | 11.300 | 11.350 | 11.970 | 13.160 |
| ID_10C <i>S. aureus</i> (mm)            | 5.742  | 7.656  | 8.307  | 9.330  | 8.908  | 10.775 |
| ID_37C <i>S. aureus</i> (mm)            | 5.662  | 6.112  | 6.310  | 6.512  | 6.907  | 7.545  |
| ID_10C <i>S. Typhimurium</i> (mm)       | 6.787  | 8.239  | 9.045  | 8.854  | 9.461  | 11.23  |
| ID_37C <i>S. Typhimurium</i> (mm)       | 7.503  | 8.406  | 9.510  | 9.215  | 9.887  | 11.113 |
| <i>Leuconostoc mesenteroides</i> (n=12) |        |        |        |        |        |        |
| Proteolytic Activity (mm)               | 0.000  | 1.682  | 3.490  | 3.436  | 4.918  | 8.258  |
| pH6                                     | 5.995  | 6.335  | 6.385  | 6.356  | 6.429  | 6.449  |
| $\Delta$ pH03                           | 0.110  | 0.131  | 0.165  | 0.181  | 0.226  | 0.301  |
| $\Delta$ pH06                           | 0.215  | 0.223  | 0.270  | 0.308  | 0.321  | 0.717  |
| $\Delta$ pH36                           | 0.079  | 0.091  | 0.099  | 0.126  | 0.113  | 0.416  |
| LAC (g/L)                               | 0.011  | 0.018  | 0.025  | 0.055  | 0.031  | 0.21   |
| ID_10C <i>L. monocytogenes</i> (mm)     | 15.090 | 18.590 | 19.510 | 19.550 | 21.230 | 23.190 |
| ID_37C <i>L. monocytogenes</i> (mm)     | 9.045  | 9.440  | 10.345 | 10.529 | 11.592 | 12.280 |

|                                      |        |        |        |        |        |        |
|--------------------------------------|--------|--------|--------|--------|--------|--------|
| ID_10C <i>S. aureus</i> (mm)         | 9.275  | 9.983  | 10.643 | 10.617 | 11.239 | 11.965 |
| ID_37C <i>S. aureus</i> (mm)         | 5.255  | 5.740  | 6.349  | 6.373  | 6.982  | 7.732  |
| ID_10C <i>S. Typhimurium</i> (mm)    | 9.590  | 10.280 | 10.810 | 10.890 | 11.390 | 12.570 |
| ID_37C <i>S. Typhimurium</i> (mm)    | 10.420 | 12.100 | 13.050 | 12.890 | 13.550 | 14.670 |
| <i>Pediococcus pentosaceus</i> (n=3) |        |        |        |        |        |        |
| Proteolytic Activity (mm)            | 0.000  | 0.000  | 4.735  | 3.403  | 5.475  | 5.475  |
| pH6                                  | 6.379  | 6.379  | 6.406  | 6.419  | 6.474  | 6.474  |
| ΔpH03                                | 0.140  | 0.140  | 0.152  | 0.172  | 0.225  | 0.225  |
| ΔpH06                                | 0.184  | 0.184  | 0.225  | 0.240  | 0.310  | 0.310  |
| ΔpH36                                | 0.043  | 0.043  | 0.073  | 0.067  | 0.084  | 0.084  |
| LAC (g/L)                            | 0.028  | 0.028  | 0.559  | 0.417  | 0.663  | 0.663  |
| ID_10C <i>L. monocytogenes</i> (mm)  | 18.050 | 19.130 | 20.210 | 19.660 | 20.460 | 20.710 |
| ID_37C <i>L. monocytogenes</i> (mm)  | 9.078  | 9.796  | 10.515 | 10.105 | 10.619 | 10.723 |
| ID_10C <i>S. aureus</i> (mm)         | 7.617  | 9.189  | 10.760 | 10.163 | 11.436 | 12.113 |
| ID_37C <i>S. aureus</i> (mm)         | 6.202  | 6.599  | 6.995  | 6.740  | 7.009  | 7.022  |
| ID_10C <i>S. Typhimurium</i> (mm)    | 10.420 | 10.550 | 10.680 | 10.660 | 10.780 | 10.870 |
| ID_37C <i>S. Typhimurium</i> (mm)    | 9.107  | 9.981  | 10.855 | 10.410 | 11.061 | 11.268 |
| <i>Weissella viridescens</i> (n=1)   |        |        |        |        |        |        |
| Proteolytic Activity (mm)            | 0.000  | 0.000  | 0.000  | 0.000  | 0.000  | 0.000  |
| pH6                                  | 6.449  | 6.449  | 6.449  | 6.449  | 6.449  | 6.449  |
| ΔpH03                                | 0.135  | 0.135  | 0.135  | 0.135  | 0.135  | 0.135  |
| ΔpH06                                | 0.239  | 0.239  | 0.239  | 0.239  | 0.239  | 0.239  |
| ΔpH36                                | 0.104  | 0.104  | 0.104  | 0.104  | 0.104  | 0.104  |
| LAC (g/L)                            | 0.308  | 0.308  | 0.308  | 0.308  | 0.308  | 0.308  |
| ID_10C <i>L. monocytogenes</i> (mm)  | 18.210 | 18.210 | 18.210 | 18.210 | 18.210 | 18.210 |
| ID_37C <i>L. monocytogenes</i> (mm)  | 11.100 | 11.100 | 11.100 | 11.100 | 11.100 | 11.100 |
| ID_10C <i>S. aureus</i> (mm)         | 11.240 | 11.240 | 11.240 | 11.240 | 11.240 | 11.240 |
| ID_37C <i>S. aureus</i> (mm)         | 6.185  | 6.185  | 6.185  | 6.185  | 6.185  | 6.185  |
| ID_10C <i>S. Typhimurium</i> (mm)    | 10.430 | 10.430 | 10.430 | 10.430 | 10.430 | 10.430 |
| ID_37C <i>S. Typhimurium</i> (mm)    | 9.883  | 9.883  | 9.883  | 9.883  | 9.883  | 9.883  |
